# Supplementary material
Source: HighWire-hosted journal article supplement (http://molpharm.aspetjournals.org/highwire/filestream/82423/field_highwire_adjunct_files/0/MOL111807.pdf)
Supplement: MOL111807.pdf [file MOL111807.pdf]

Hiroaki Takesue, Takeshi Hirota, Mami Tachimura, Ayane Tokashiki, Ichiro Ieiri

Nucleosome positioning and gene regulation of the *SGLT2* gene in the human kidney

Molecular Pharmacology

### Supplemental Table 1

Primer sequences for the cloning of *SGLT2* reporter plasmids

| Primer                                          |         | Sequence (5' to 3') <sup>a</sup>                 | Annealing (°C) | Restriction enzymes |
|-------------------------------------------------|---------|--------------------------------------------------|----------------|---------------------|
| Cloning of the <i>SGLT2</i> 5'-flanking region  |         |                                                  |                |                     |
| -3185                                           | Forward | TGGCCTAACTGGCCGGTACCTTCCCGACCGCCT                | 60.0           | -                   |
| +18                                             | Reverse | AGTACCGGATTGCCACTCCCCAGGATCTGCCCC                |                |                     |
| In-Fusion cloning and site-directed mutagenesis |         |                                                  |                |                     |
| Del-(-51/-37)                                   | Forward | GGCTCAGTGCCCCTGCTTCCCCTGGGGGAATCC                | 60.0           | -                   |
|                                                 | Reverse | CAGGGGCACTGAGCCGACAAGTCCCCCAGGTCT                |                |                     |
| -2320                                           | Forward | GTTTGTAAATGAAGGAAGGT <u>ACCAGGAAGGAAGAAAGA</u>   | 60.0           | Kpn□                |
|                                                 | Reverse | TCTTTCCTTCCTTCCTGGT <u>TACCTTCCTTCATTAACAAAC</u> |                |                     |
| -1587                                           | Forward | CCAAGTCTCTTTGTGGT <u>TACCTGACAAATGACACAC</u>     | 60.0           | Kpn□                |
|                                                 | Reverse | GTGTGTCATTTGTCAGGGT <u>ACCACAAAGAGCAGTTGG</u>    |                |                     |
| -485                                            | Forward | CAAAAATCTGGGCTGGT <u>TACCTTAAAGGAGTGGGAAAGGA</u> | 60.0           | Kpn□                |
|                                                 | Reverse | TCCTTTCCTTCCTTTAAGGT <u>ACCAGCCCAGATTTTTG</u>    |                |                     |
| -154                                            | Forward | TGGAAGGGCCCAGGT <u>ACCCAAGACCAGCC</u>            | 60.0           | Kpn□                |
|                                                 | Reverse | GGCTGGTCTTGGT <u>TACCTGGGCCCTTCCA</u>            |                |                     |
| -44                                             | Forward | GGCTCAGTGCCCCTGAGGT <u>ACCCATTAATCCTTC</u>       | 60.0           | Kpn□                |
|                                                 | Reverse | GAAGGATTAATGGT <u>TACCTCAGGGGCACTGAGCC</u>       |                |                     |

<sup>a</sup>The restriction site is underlined, and nucleotide changes are marked in bold letters.

Hiroaki Takesue, Takeshi Hirota, Mami Tachimura, Ayane Tokashiki, Ichiro Ieiri

Nucleosome positioning and gene regulation of the *SGLT2* gene in the human kidney

Molecular Pharmacology

### Supplemental Table 2

Direct sequence oligonucleotides for the cloning of *SGLT2* reporter plasmids

| Location |           | Sequence (5' to 3')      |
|----------|-----------|--------------------------|
| SGLT2    | Antisense | TGAGAGAAATCCAGTGCCAAGT   |
|          | Antisense | CCTGAGATGAGAATTTGTGTGC   |
|          | Sense     | GCTTTGTTGGTTTTTCTCCTTGTT |
|          | Sense     | CCACACCCAGCCAGTCCTAC     |
|          | Sense     | GGAAGGATGAGCGGGAATTG     |
| pGL4.10  | Sense     | GCAGGTGCCAGAACATTTCT     |

### Supplemental Table 3

Primer sequences and oligonucleotides for the cloning of the HNF1 $\alpha$  expression plasmid

| Primer                                     |           | Sequence (5' to 3')                |
|--------------------------------------------|-----------|------------------------------------|
| Cloning of the HNF1 $\alpha$ coding region |           |                                    |
|                                            | Forward   | CAGTGTGGTGAATTATGGTTTCTAAACTGAGCCA |
|                                            | Reverse   | GCCACTGTGCTGGATTTACTGGGAGGAAGAGGC  |
| Direct sequencing                          |           |                                    |
| HNF1 $\alpha$                              | Sense     | AGCAGTTCACCCATGCAGG                |
| T7                                         | Sense     | TTGTAATACGACTCACTATAG              |
| BGH                                        | Antisense | TAGAAGGCACAGTCGAGG                 |

### Supplemental Table 4

Primer sequences for quantitative PCR

| Gene          |         | Sequence (5' to 3')       | Position     |
|---------------|---------|---------------------------|--------------|
| SGLT2         | Forward | TTCAGTCTCCGGCATAGCAA      | 1700 to 1719 |
|               | Reverse | CATCTCCATGGCACTCTCTGG     | 1807 to 1787 |
| HNF1 $\alpha$ | Forward | CCCTGGGTCCTACGTTCA        | 1463 to 1480 |
|               | Reverse | GGGTCACATGGCTCTGCA        | 1657 to 1640 |
| RPL13         | Forward | GAGACAGTTCTGCTGAAGAACTGAA | 486 to 510   |
|               | Reverse | TCCGGACGGGCATGAC          | 551 to 536   |

Hiroaki Takesue, Takeshi Hirota, Mami Tachimura, Ayane Tokashiki, Ichiro Ieiri

Nucleosome positioning and gene regulation of the *SGLT2* gene in the human kidney

Molecular Pharmacology

### Supplemental Table 5

Primer sequences for NOME-Seq

| Primer        |         | Sequence (5' to 3')          | Position     |
|---------------|---------|------------------------------|--------------|
| Bisulfite PCR |         |                              |              |
| SGLT2         | Forward | TGGGAAAGGATTTTTGATTTTTTT     | -477 to -454 |
|               | Reverse | CCCCTAAATCCCCCAAAAA          | -14 to -33   |
| GAPDH         | Forward | GGGTTTTTGTTTTGATTTTTTAGTGTTT | -220 to -192 |
|               | Reverse | CAATCCCAGCCCAAATCTTAAA       | +25 to +3    |
| Colony PCR    |         |                              |              |
| T7            | Forward | TTCAGTCTCCGGCATAGCAA         |              |
| SP6           | Reverse | CATCTCCATGGCACTCTCTGG        |              |

**Supplemental Table 6**

## Primer sequences for NuSA

| Position     |         | Sequence (5' to 3')              | Midpoint |
|--------------|---------|----------------------------------|----------|
| -547 to -522 | Forward | TTTGGTGGGGATAAAATATCTGGTCA       | -462     |
| -377 to -400 | Reverse | TCTTCAGCCTGATTTCCAATCCTG         |          |
| -508 to -487 | Forward | GCAAAAATCTGGGCTGGGTAGG           | -445     |
| -383 to -405 | Reverse | GCCTGATTTCCAATCCTGGTCAT          |          |
| -454 to -430 | Forward | CTAGATTTGGTTTGGAGAAGCAGGG        | -381     |
| -309 to -334 | Reverse | TTTCAAATCCAAGTCTGACAGGGTC        |          |
| -419 to -402 | Forward | GCGGGAATTGGGGCATGA               | -353     |
| -287 to -318 | Reverse | TTTAACTAATCCAGAGGAATCATTTTCAAATC |          |
| -365 to -342 | Forward | GAGCTATGGAGGGTTCCTGAGGAG         | -289     |
| -214 to -237 | Reverse | TGCTCCAGGCTCAAATCACTCTT          |          |
| -316 to -287 | Forward | TTTGAAAATGATTCCTCTGGATTAGTTAAA   | -258     |
| -200 to -217 | Reverse | CGCCCTCTCCCCTGTGCT               |          |
| -316 to -287 | Forward | TTTGAAAATGATTCCTCTGGATTAGTTAAA   | -236     |
| -157 to -179 | Reverse | GCCCTTCCAAGTTCAAGAGCACT          |          |
| -237 to -214 | Forward | AAGAGTGATTTTGAGCCTGGAGCA         | -170     |
| -104 to -131 | Reverse | TGTTTAGCTGAATCAGGTCATATCAAGG     |          |
| -181 to -158 | Forward | AGAGTGCTCTTGAACCTGGAAGGG         | -123     |
| -65 to -84   | Reverse | CCGACAAGTCCCCCAGGTCT             |          |
| -144 to -120 | Forward | GACCAGCCTTCAGCCTTGATATGAC        | -69      |
| +6 to -13    | Reverse | CCCCATCCAGGAACCAGCC              |          |
| -91 to -71   | Forward | GGGAATGAGACCTGGGGGACT            | -25      |
| +41 to +20   | Reverse | CTGCCTCTGTGTGCTCCTCCAT           |          |
| -17 to +1    | Forward | GGGGCTGGTTCCTGGATG               | +51      |
| +119 to +95  | Reverse | GGAAATATGCAGCAATGACTAGGAT        |          |
| +3 to +23    | Forward | GGCAGATCCTGGGGAGAATGG            | +74      |
| +144 to +124 | Reverse | CACAAGCCAACGCCAATGACC            |          |

Hiroaki Takesue, Takeshi Hirota, Mami Tachimura, Ayane Tokashiki, Ichiro Ieiri

Nucleosome positioning and gene regulation of the *SGLT2* gene in the human kidney

Molecular Pharmacology

### Supplemental Table 7

Primer sequences for the ChIP assay

| Name                  |         | Sequence (5' to 3')         | Position     | Annealing (°C) |
|-----------------------|---------|-----------------------------|--------------|----------------|
| Semi-quantitative PCR |         |                             |              |                |
| Distal                | Forward | TTTGGTGGGGATAAAATATCTGGTCAA | -547 to -521 | 60.0           |
|                       | Reverse | TGTGCTCCAGGCTCAAATCACTC     | -212 to -235 |                |
| Proximal              | Forward | AGACCAGCCTTCAGCCTTGATATGA   | -145 to -121 | 60.0           |
|                       | Reverse | ACGCCAATGACCAGCAGGAAATA     | +135 to +113 |                |
| Quantitative PCR      |         |                             |              |                |
|                       | Forward | GACCAGCCTTCAGCCTTGATATGACC  | -144 to -119 |                |
|                       | Reverse | CCTCCATTCTCCCCAGGATCTGC     | +26 to +4    |                |

Hiroaki Takesue, Takeshi Hirota, Mami Tachimura, Ayane Tokashiki, Ichiro Ieiri

Nucleosome positioning and gene regulation of the *SGLT2* gene in the human kidney

Molecular Pharmacology

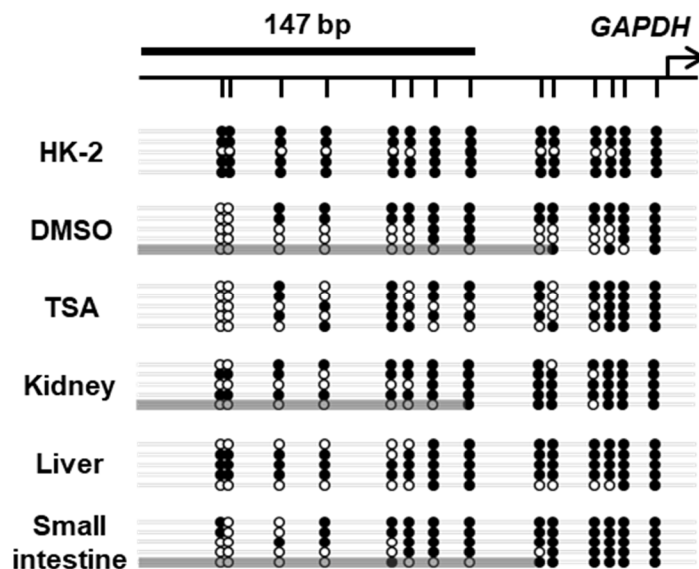

**Supplemental Figure 1 NOME-Seq analysis of nucleosome occupancy in *GAPDH* 5'-FR in HK-2 cells and human tissues.**

The arrow indicates the *GAPDH* TSS. Vertical lines indicate GpC sites. White circles represent unmethylated GpC sites and black circles represent methylated GpC sites. Gray bars represent nucleosome occupancy, which is the region of consecutive unmethylated GpC sites over 147 bp.

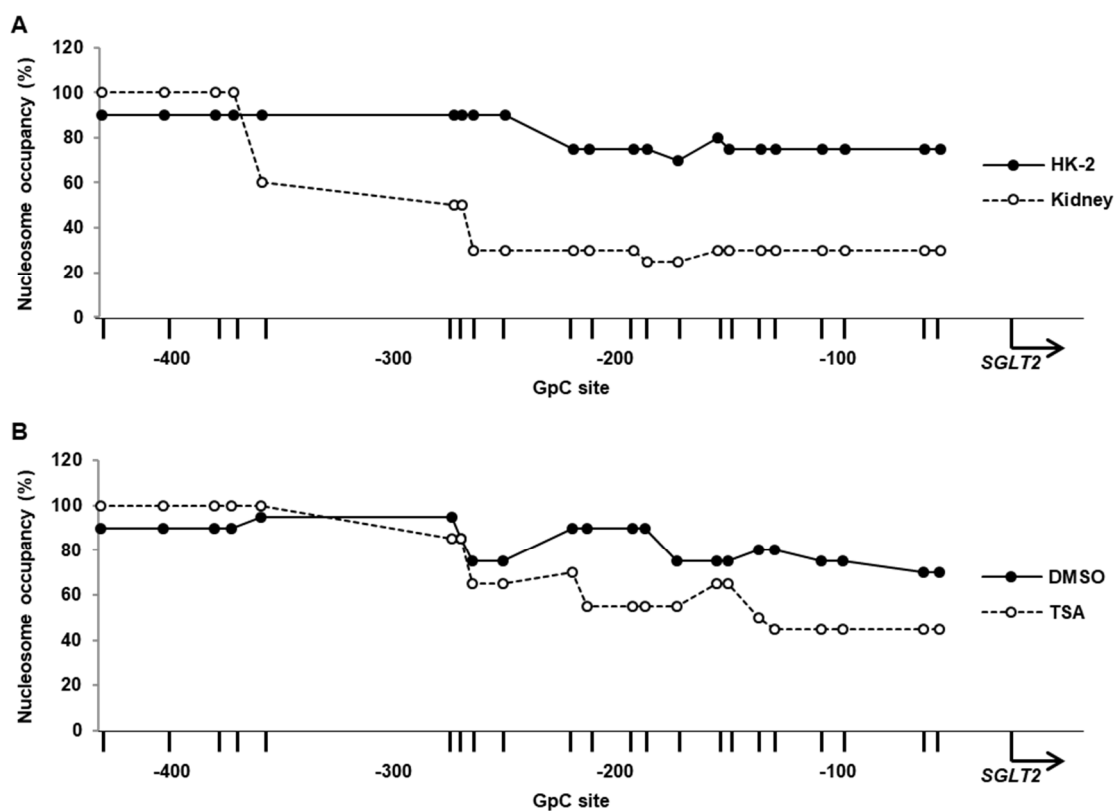

**Supplemental Figure 2 Analysis of nucleosome occupancy in HK-2 cells and the human kidney**

NOME-Seq data of *SGLT2* 5'-FR in (A) HK-2 cells and the human kidney, and (B) DMSO- and TSA-treated HK-2 cells. Graph represents the proportion of nucleosome-occupied GpC sites in 5'-FR in the three tissues. The arrow indicates the *SGLT2* TSS. Vertical lines indicate GpC sites.

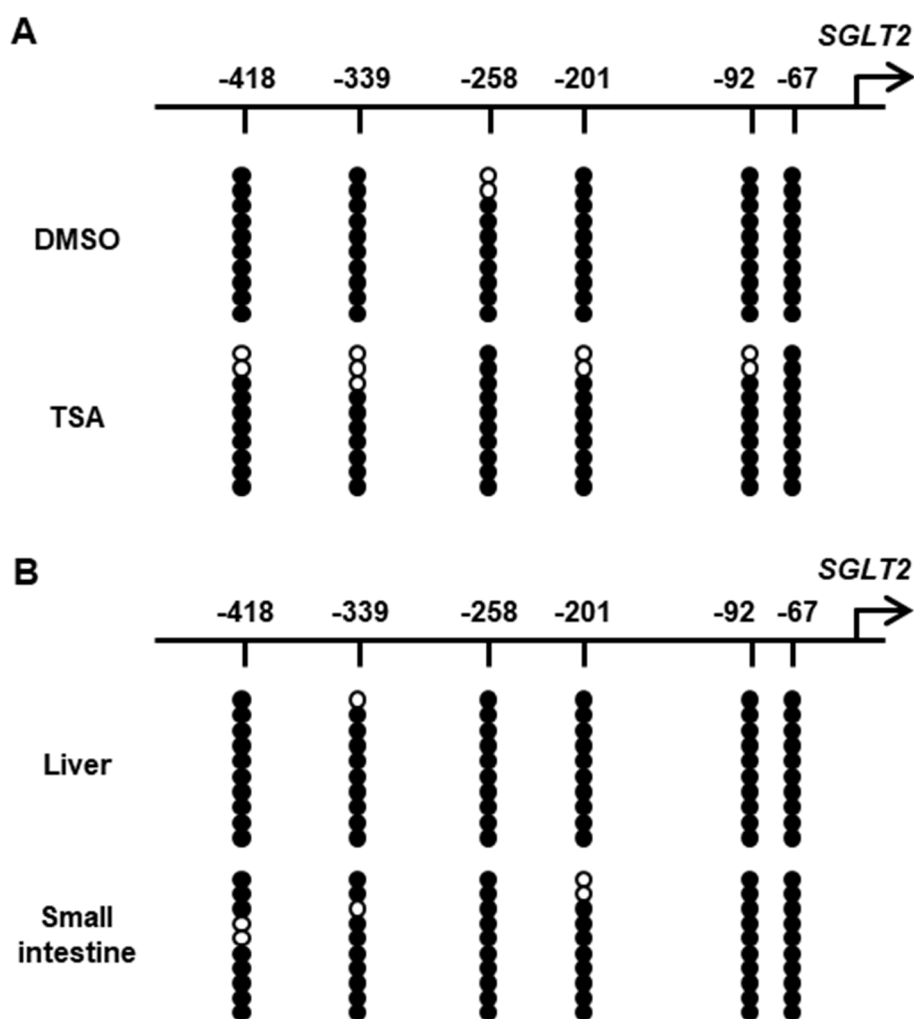

**Supplemental Figure 3 Analysis of endogenous DNA methylation in HK-2 cells and human tissues.**

NOMe-Seq data of *SGLT2* 5'-FR in (A) DMSO- or TSA-treated HK-2 cells and (B) human liver and small intestine. The arrow indicates the *SGLT2* TSS. Vertical lines indicate CpG sites. White circles represent unmethylated CpG sites and black circles represent methylated CpG sites.



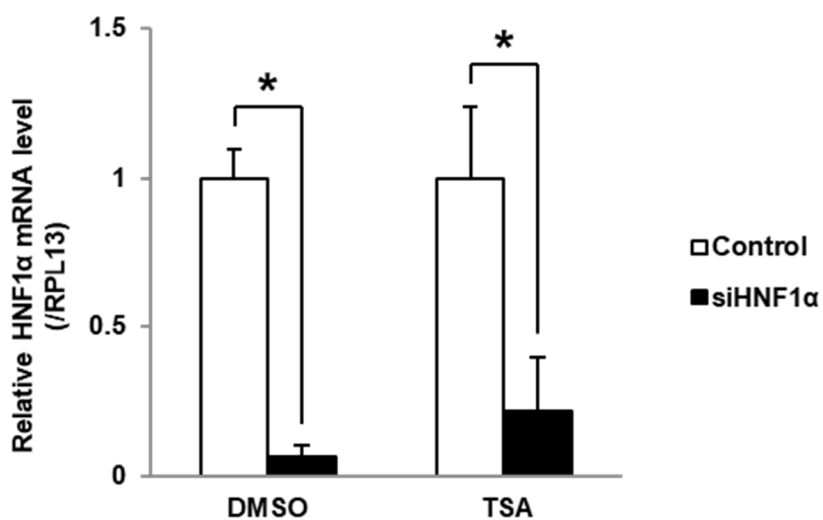

**Supplemental Figure 4 Analysis of HNF1α mRNA expression in siHNF1α-transfected HK-2 cells**

HK-2 cells were reverse-transfected with negative control (white bars) or siHNF1α (black bars) for 24 hours, and then treated with DMSO or TSA for 24 hours. HNF1α mRNA levels were measured by quantitative PCR and normalized to RPL13 mRNA levels. Results are expressed relative to HNF1α mRNA levels in the control group. Results represent the mean ± SD of three independent experiments. \*P < 0.05.

Hiroaki Takesue, Takeshi Hirota, Mami Tachimura, Ayane Tokashiki, Ichiro Ieiri

Nucleosome positioning and gene regulation of the *SGLT2* gene in the human kidney

Molecular Pharmacology

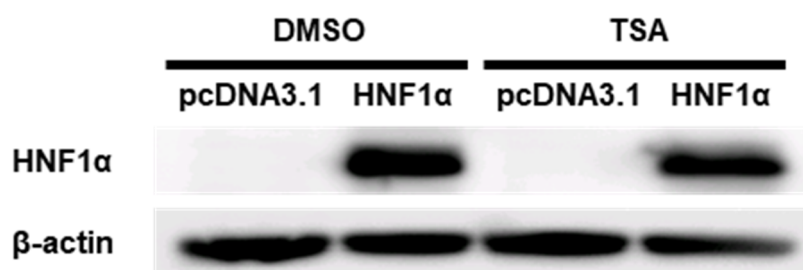

**Supplemental Figure 5 Analysis of HNF1 $\alpha$  expression in HNF1 $\alpha$ -expressing HK-2 cells**

Western blot analyses representing HNF1 $\alpha$  and  $\beta$ -actin protein expression in HNF1 $\alpha$ -expressing HK-2 cells with DMSO or TSA treatment.
